# Supplementary material for: Cold Plasma Treatment of Sunflower Seeds Modulates Plant-Associated Microbiome and Stimulates Root and Lateral Organ Growth
Source: Front Plant Sci. 2020 Aug 28;11:568924. doi: 10.3389/fpls.2020.568924 (PMC7485318; doi:10.3389/fpls.2020.568924)
Supplement: Supplementary file 2 [file Table_1.xls]

## Sheet: heat map
Cold plasma treatment of sunflower seeds modulates plant-associated microbiome and stimulates root and lateral organ growth
Inga Tamošiūnė, Dalia Gelvonauskienė, Perttu Haimi, Vida Mildažienė, Kazunori Koga, Masaharu Shiratani, Danas Baniulis
Table S5. A heatmap comparing genus-level bacterial diversity and abundance among the controls and cold plasma treated groups based on high-throughput sequencing results. The relative abundance of each genus is indicated by a gradient of color from green (low abundance) to red (high abundance). Heatmap rows show normalized average relative abundance. Abbreviations: CR, CC, CL – roots cotyledons a…
		CR	PR	CC	PC	CL	PL
		16	11					Acidipila
		85				40		Acidovorax	0				0.5				1
		27	30		132			Actinoallomurus
		89	53					Actinomadura
		14						Actinospica
		159				162		Aequorivita
		1403	395	614	10	2425	132	Aeromicrobium
		74						Agrococcus
		51				44		Algoriphagus
		25				98		Altererythrobacter
						11		Amaricoccus
		12				102		Arenimonas
						384		Arsenophonus
		414	59			1183	53	Arthrobacter
		419	219					Asticcacaulis
		43				80		Aurantimonas
		171	1321	95	52	1164	283	Bacillus
						15		Bacteriovorax
		84						Bartonella
		57				12		Bdellovibrio
			128	26			24	Bosea
			303			39	26	Brevibacillus
		100				168	10	Brevundimonas
		407	612	13			214	Burkholderia
		13						Caenimonas
		18	436	16		8294		Candidatus Portiera
			229	15	27		57	Candidimonas
		271	2742	931	286	300	391	Chitinophaga
			40	45	10	67		Chryseobacterium
			13					Conexibacter
		1724	348	369	9152	181	130	Curtobacterium
						11		Cytophaga
						29		Delftia
		1261	139	46		227	134	Devosia
		62	56					Dokdonella
						11		Duganella
			17	26				Dyadobacter
		41	94	40		12		Dyella
		89	72	59				Edaphobacter
		10	238	110	49	33	65	Ensifer (Sinorhizobium)
		430	188	56	986	63	471	Enterobacter
			21	17				Erwinia
		11				108		Erythrobacter
				55	65		19	Escherichia
		350	2138	379	255	186	415	Flavisolibacter
		234	213	62	30	127		Flavobacterium
		61	51	10				Fluviicola
		18						Frateuria
		761		45		208	92	Gemmobacter
						10		Geobacillus
		16				72		Gillisia
		295	226	28		799	10	Gordonia
			62	143		29		Granulicella
		10	11					Gryllotalpicola
		16	12					Gynumella
		18				82		Halobacillus
		36				24		Hydrocarboniphaga
		342				156	16	Hydrogenophaga
		58	92	49		51		Hyphomicrobium
		16	12					Janthinobacterium
			28					Jatrophihabitans
						172		Jeotgalibacillus
			207	322	14	98		Kaistia
			15	15				Kluyvera
						16		Kocuria
		43	39					Kribbella
						15		Laceyella
							10	Lactobacillus
			14			13		Leclercia
		53	42			54	14	Legionella
		16	14	13				Leifsonia
							10	Leuconostoc
		4701	114	544	25	2577	231	Limnobacter
		54				78		Loktanella
			13					Luteimicrobium
		292				703		Lysobacter
		84				12		Malikia
		12				12		Mariniflexile
		43	141	118		88	13	Marmoricola
		1650	2116	10	22	120	28	Massilia
		168	155	67	13	102	46	Mesorhizobium
		124	1795	2241	171	746	741	Methylobacterium
		58				11		Methylophaga
		101	207	128		72		Methylophilus
		68	150	77		59	27	Methylotenera
		46	1156	529	48	160	74	Methylovorus
		361	467	691	66	282	209	Microbacterium
		673	1802	289	102	132	149	Mucilaginibacter
		15454	1333	83	16624	307	108874	Mycobacterium
		46		37		24		Nakamurella
			13					Niabella
		70	26	38		155		Nocardia
		5723	2640	630	165	10583	1145	Nocardioides
		91	3395	1131	375	366	638	Novosphingobium
			92				28	Oceanobacillus
		37				20		Ochrobactrum
		24				27		Ornithinibacter
		1283	1276					Oxalicibacterium
		39	2888	275	94	141	1565	Paenibacillus
						49		Paenisporosarcina
		28	15			46		Panacagrimonas
		1069	488	141	205	22	102	Pantoea
		456				395	54	Paracoccus
			46	10				Parvibaculum
		112	1585	903	160	624	371	Patulibacter
		787	2765	474	423	194	796	Pedobacter
		38				57		Peredibacter
			29					Phenylobacterium
		22				29		Phyllobacterium
						12		Planococcus
		13				192		Planomicrobium
		11				48		Pontibacter
		151	339	25	98	82	189	Propionibacterium
			57	12	23		29	Pseudaminobacter
		67	58					Pseudolabrys
		3635	3600	933	633	12643	927	Pseudomonas
		683	1174	5945	101	1548	114	Pseudonocardia
		56				14		Pseudorhodobacter
		45				83		Pseudoxanthomonas
			3146	353	430	142	774	Pusillimonas
			12					Rathayibacter
		799	32	11		197	133	Rhizobium
		42	53					Rhizomicrobium
		1515	1040					Rhodanobacter
		1517	10097	4030	627	3794	691	Rhodococcus
		10	10					Rhodoferax
		13	17					Rhodoplanes
			247	120	23	11	79	Rhodopseudomonas
						10		Rugamonas
		12	22					Saccharopolyspora
		17	67					Salinibacterium
		15				218		Salinimicrobium
		87				159		Salinirepens
			54					Segetibacter
		160	83	11			11	Shinella
		10				114		Sinorhizobium
						34		Skermanella
		199	21752	7358	149	2633	340	Solimonas
			10					Sphingobacterium
						11		Sphingomicrobium
		43	500	26	22	143	25	Sphingomonas
			22			27		Sphingopyxis
		10				79		Sphingosinicella
		31	32			53		Sporichthya
						13		Sporosarcina
		59	46	11	14	35	45	Staphylococcus
		12	15			76		Stenotrophomonas
		16	71	13		11	15	Streptococcus
		5282	6089	39	147	14	105	Streptomyces
		35	1632	1058	36	344	89	Sulfuricella
						47		Thermoactinomyces
		159	26			457	34	Thermomonas
					13			Trabulsiella
		82		13		34		Variovorax
		11				52		Virgibacillus
		10						Vitellibacter
		396	180	125		962	13	Williamsia
		14						Winogradskyella
